# Supplementary material for: Plasmonic Hybrid Thin Film for Broadband Absorption and Characterization of Its Optical and Electrical Properties
Source: Hindawi journal article supplement (doi:10.1155/2017/8319463), 2017-01-01
Supplement: f1 [file 8319463.f1.docx]

**Design of plasmonic hybrid thin film for broadband absorption and their optical and electrical properties**

Sook Young Moon *1

1Structures and Advanced Composite Research Unite, Japan Aerospace Exploration Agency (JAXA), 6-13-1, Osawa, Mitaka, Tokyo 181-0015


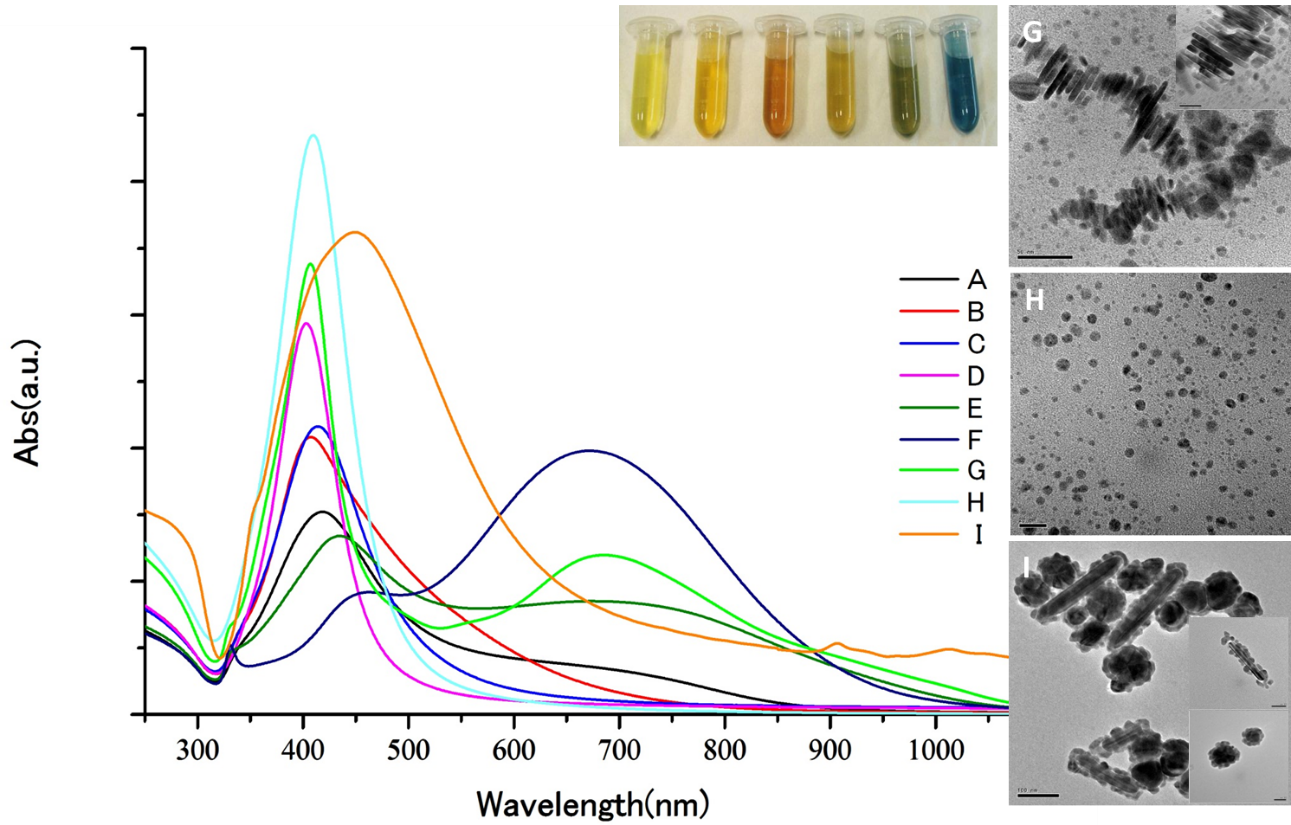


**Figure S1.** Optical properties of Synthesized Various Silver Nanoparticles
